# Supplementary material for: Blood nerve barrier permeability enables nerve targeting of circulating nanoparticles in experimental autoimmune neuritis
Source: Springer Nature journal article supplement (doi:10.1038/s41598-025-96231-z), 2025-04-06
Supplement: MOESM1 [file 41598_2025_96231_MOESM1_ESM.pdf]

**Supplementary information**

**Blood nerve barrier permeability enables nerve targeting of circulating nanoparticles in  
experimental autoimmune neuritis**

Chanpreet Kaur,<sup>1,2</sup> Ellaina Villarreal,<sup>1</sup> Maleen H. Cabe,<sup>1,2</sup> and Kelly A. Langert\*<sup>1,2</sup>

Department of Molecular Pharmacology and Neuroscience

Loyola University Chicago, Stritch School of Medicine, Maywood, IL 60153 (U.S.A.)<sup>1</sup>

Research Service

Edward Hines Jr. VA Hospital, Hines, IL 60141 (U.S.A.)<sup>2</sup>

Supplementary Fig. S1.

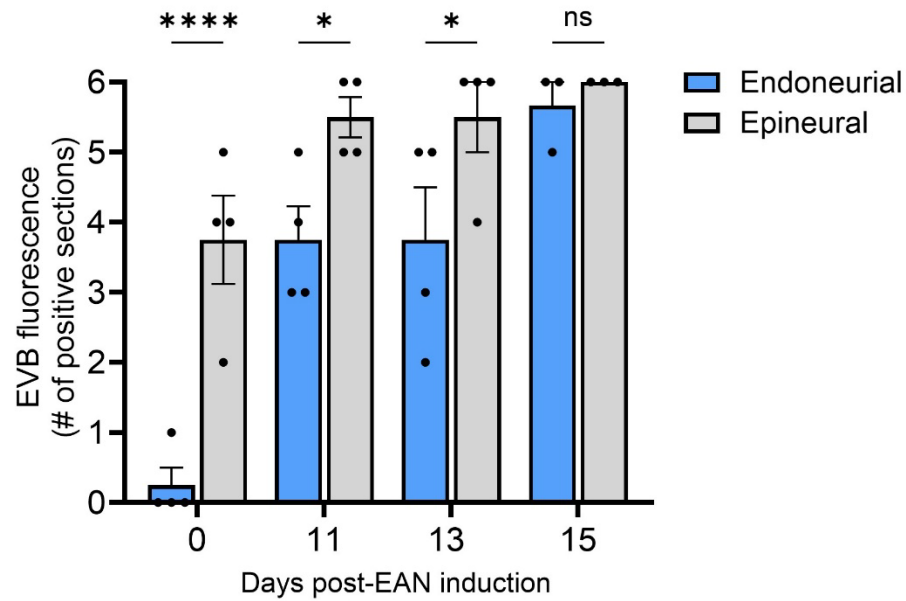

**Supplementary Fig. S1.** Accumulation of a small molecule tracer in the epineurium and endoneurium over the course of EAN. Rats received a tail vein injection of Evans blue dye (EVB, 69 kDa) at key disease stages, and nerves were collected 30 minutes later. EVB permeation ( $\lambda_{ex}/\lambda_{em} = 610/680$  nm) in epi- and endoneurial compartments of transverse nerve sections was assessed. Data are reported as the number of nerve sections (out of 6 per rat) exhibiting positive staining in the respective compartment. Shown are the mean  $\pm$  SEM,  $n=3-4$  rats/group, \*\*\*\* $p<0.0001$ , \* $p<0.05$ , Mixed effects analysis followed by Tukey's multiple comparison.

Supplementary Fig. S2

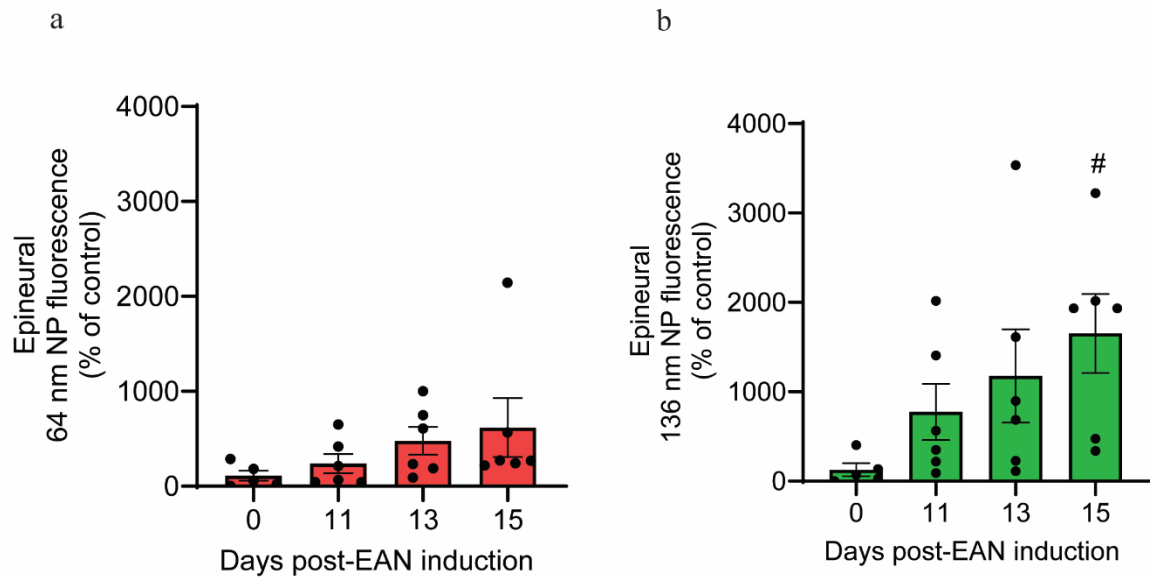

**Supplementary Fig. S2.** Accumulation of nanoparticle tracers in the epineurium over the course of EAN.

Rats received a tail vein injection of a cocktail of **(a)** 64 nm and **(b)** 136 nm PEGylated NPs at key disease stages, and nerves were collected 30 minutes later. Epineural accumulation was quantified as: (fluorescence intensity of ROI containing entire fascicle) – (fluorescence intensity of ROI containing endoneurium only) and normalized to control (Day 0) fluorescence. Data shown are the mean  $\pm$  SEM,  $n = 4-5$  rat/group, # $p < 0.05$  vs. Day 0, ordinary one-way ANOVA followed by Fisher's LSD multiple comparison.
